# Supplementary material
Source: HighWire-hosted journal article supplement (https://sti.bmj.com/content/94/3/163)
Supplement: inline-supplementary-material-1 [file inline-supplementary-material-1.pdf]

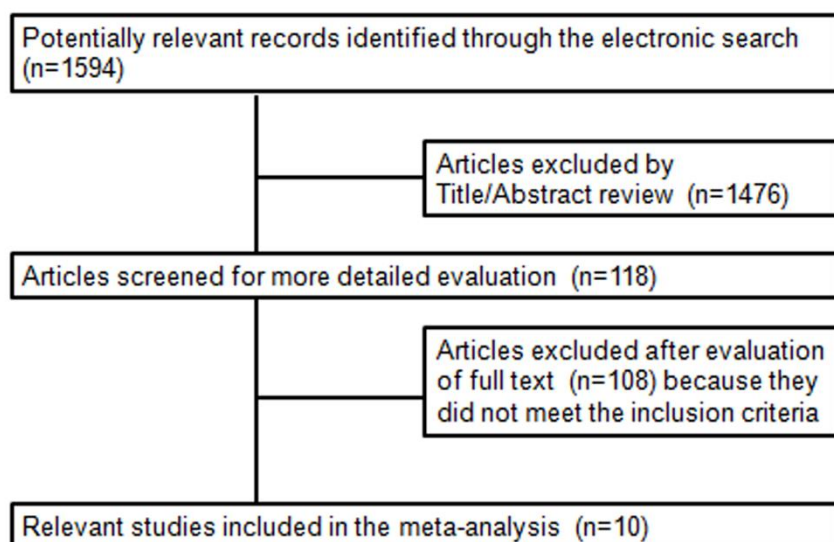

Figure S1 Flow diagram of the selection process for identifying the relevant studies

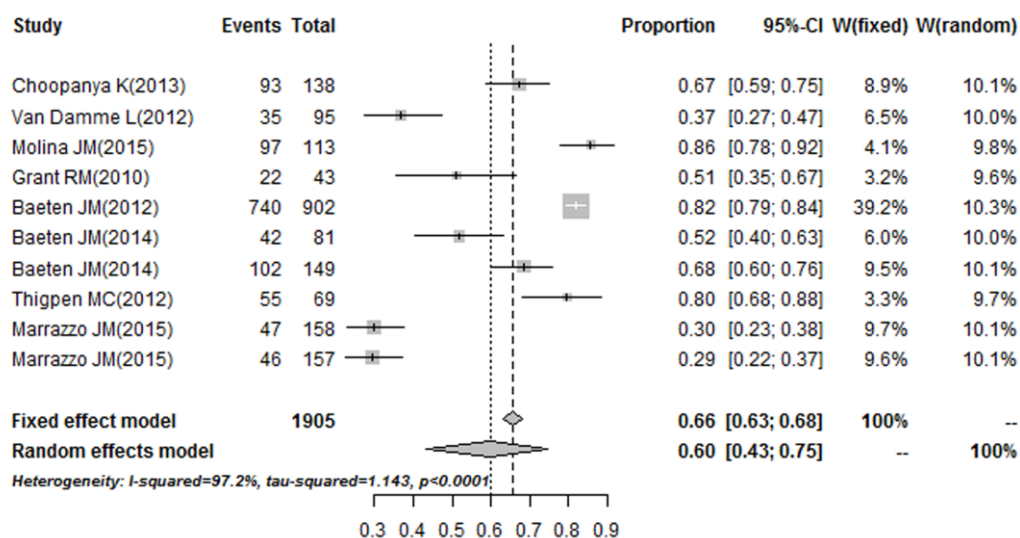

Figure S2 Forest plot of MTC level in PrEP clinical trials

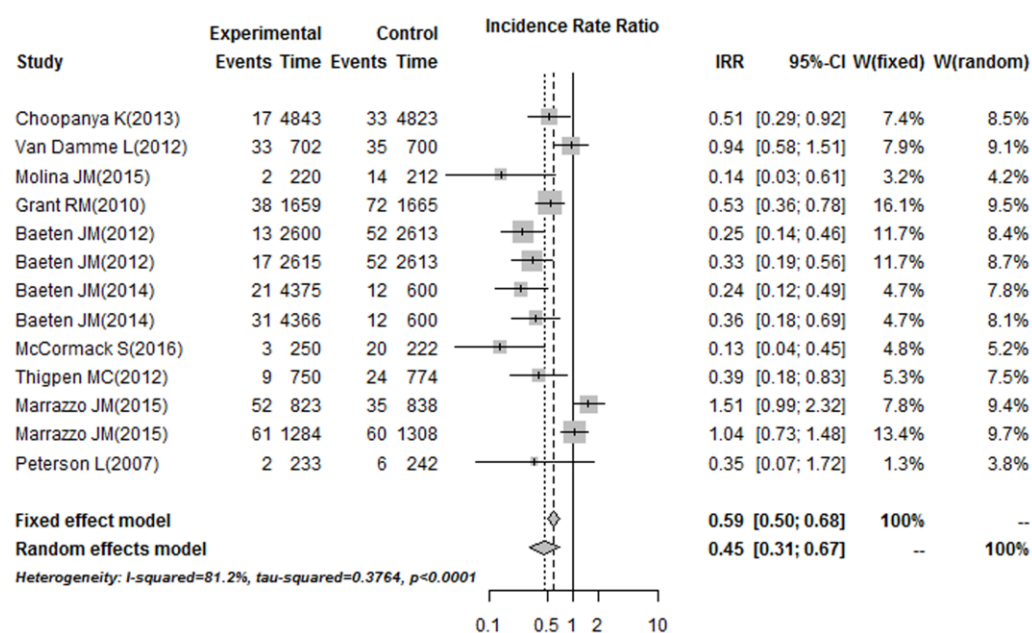

Figure S3 Forest plot of incidence rate ratio for PrEP clinical trials
